# Supplementary material for: Quadruplex ligands may act as molecular chaperones for tetramolecular quadruplex formation
Source: PubMed Central journal article supplement — Nucleic Acids Res. 2007 Mar 29;35(8):2483–93. doi: 10.1093/nar/gkm098 (PMC1885647; doi:10.1093/nar/gkm098), 2007-03-29
Supplement: nar_gkm098_1.pdf [file nar_gkm098_1.pdf]

# Quadruplex ligands may act as molecular chaperones for tetramolecular quadruplex formation

Anne De Cian<sup>1</sup> & Jean-Louis Mergny<sup>1\*</sup>

Supplementary Material

February 3, 2007

## SUPPLEMENTARY METHODS

### *Circular dichroism*

Formation of a parallel quadruplex was confirmed by circular dichroism (**Supplementary Figure S1A**) on a Jasco J-810 CD spectrophotometer, thermostated with Peltier effects. For thermal denaturation, CD scans (1 accumulation from 320 to 235 nm at 200 nm/min, in a 1 cm path length cell, with a data pitch of 1 nm and a response of 1 s) were recorded at regular time/temperature intervals, every 120s for a heating rate of 0.5°C/min (increase of 1°C every 2 min, scanning after 1min30 for temperature stabilization), and plots of ellipticity vs. temperature were generated for 260nm. Most melting curves recorded by heating a preformed quadruplex do not correspond to equilibrium melting curves (hysteresis phenomenon) and the "T<sub>m</sub>" deduced from these experiments depends on the heating rate. In order to distinguish it from the true thermodynamic T<sub>m</sub>, we will call this value T<sub>1/2</sub>. The heating rate applied for CD melting experiments may be a little high for accurate temperature stabilization during the scans, but it was chosen in order to be in agreement with the T<sub>1/2</sub> found using absorbance

(without any ligand); this may explain the 1-2°C difference between the  $T_{1/2}$  values obtained by CD and absorbance experiments.

### ***Fluorescence titrations***

Fluorescence spectra were recorded at 4°C in 3ml quartz cuvetts containing 10 mM lithium cacodylate pH 7.2 and 110mM KCl. The emission of 0.6μM ligand 360A (excitation at 320 nm) was measured after successive additions of G-quadruplex [PO<sub>4</sub>-TG<sub>3</sub>T]<sub>4</sub> (preformed at higher concentration (1440 μM) in the same buffer), or of single-stranded PO<sub>4</sub>-TG<sub>3</sub>T (in ddH<sub>2</sub>O and freshly heat denaturated). Considering our study and the weak concentration of ligand used for the titration we assumed that the induction of tetramolecular species from the single-stranded oligonucleotide was negligible during the time course of the experiment.

**Supplementary Table 1** : Properties of the DNA ligands tested:

| Compound     | MW <sup>a</sup> | Charge | $\Delta T_m$ (K <sup>+</sup> ) <sup>b</sup> | $\Delta T_m$ (Na <sup>+</sup> ) <sup>b</sup> | Kd (M) <sup>c</sup>     | n <sup>d</sup> | References <sup>e</sup> |
|--------------|-----------------|--------|---------------------------------------------|----------------------------------------------|-------------------------|----------------|-------------------------|
| 360A         | 449.5           | +2     | 30 °C                                       | 25.1 °C                                      | 6.4 x 10 <sup>-8</sup>  | 2              | (1-3)                   |
| Telomestatin | 582.5           | 0      | 22.8 °C                                     | 23.6 °C                                      | nd                      | 2              | (4-6)                   |
| TMPyP4       | 678.8           | +4     | 27.4 °C                                     | 21 °C                                        | 1.4 x 10 <sup>-5</sup>  | 2-4            | (6-10)                  |
| Ethidium     | 314.4           | +1     | 0.7 °C                                      | 1.1 °C                                       | 6.7 x 10 <sup>-6*</sup> | 1-2            | (11-13)                 |
| 307A         | 449.5           | +2     | 32°C                                        | 25°C                                         | 9.0 x 10 <sup>-9</sup>  | 2              | (1-3)                   |
| 12459        | 410.5           | +2     | 26.5°C                                      | 15.6°C                                       | nd                      | 2              | (14)                    |
| BRACO19      | 595.8           | +2     | 22°C                                        | 11°C                                         | 6.3 x 10 <sup>-8</sup>  | 2              | (15)                    |
| BSU1051      | 608.8           | +2     | 9°C                                         | 3.5°C                                        | nd                      |                | (16)                    |
| PIPER        | 614.7           | (+2)   | 23°C                                        | 16°C                                         | nd                      | 1-2            | (17-19)                 |

<sup>a</sup> : Not taking into account possible counterions.

<sup>b</sup> : Experimental conditions as in De Cian *et al.* (20) with the intramolecular G-quadruplex FAM-GGG(TTAGGG)<sub>3</sub>-TAMRA for 1 $\mu$ M of ligand. Values are given with a precision of 1°C.

<sup>c</sup> : K<sub>d</sub> Dissociation constant of the ligand for 22AG quadruplexe except when notified by \* (Ethidium – T<sub>4</sub>G<sub>4</sub>). Note that the experimental conditions used may vary.

<sup>d</sup> : Stoichiometry (number of binding sites per quadruplex) found (by Mass spectrometry or titrations) or predicted (by molecular modeling).

<sup>e</sup> : Examples of articles where the interaction of this molecule has been tested on quadruplex DNA; this list is not exhaustive.

**Supplementary Figure S1: Formulae of the duplex/G-quadruplex ligands used in this study.**

**Supplementary Figure S2: Interaction of 360A and [PO<sub>4</sub>-TG<sub>3</sub>T]<sub>4</sub>: CD spectra and melting experiment**

**A:** CD spectra of PO<sub>4</sub>-TG<sub>3</sub>T at 25°C in 10mM lithium cacodylate pH 7.2, 110mM KCl for various conditions: black line: PO<sub>4</sub>-TG<sub>3</sub>T 20μM (G-quadruplex preformed at 1440 μM in 10mM Lithium Cacodylate pH 7.2, 110mM KCl at 4°C over a week); green triangles: PO<sub>4</sub>-TG<sub>3</sub>T 20μM (Preformed G-quadruplex) + 360A 5μM ; Light blue triangles: PO<sub>4</sub>-TG<sub>3</sub>T 20μM incubated overnight at 4°C with 5μM 360A; dark blue circles: PO<sub>4</sub>-TG<sub>3</sub>T 20 μM incubated 2 days at 4°C with 10 μM 360A ; red triangles : PO<sub>4</sub>-TG<sub>3</sub>T 20μM single-stranded.

**B:** Thermal denaturation of PO<sub>4</sub>-TG<sub>3</sub>T preformed G-quadruplex alone or induced G-quadruplex at 20 μM (strand concentration) by 360A after O/N incubation with 5 or 10μM 360A. CD signal is recorded at 260nm and normalized between 0 and 1: PO<sub>4</sub>-TG<sub>3</sub>T 20μM alone (preformed at higher concentration)(black diamonds) or induced with 5μM (light blue triangles) or 10 μM (dark blue triangles) 360A.

**C:** CD spectra as a function of temperature for the Phosphorylated TG<sub>3</sub>T oligonucleotide alone (left) or in the presence of 10 μM 360A (right). The arrows show the direction of temperature increase.

**Supplementary Figure S3: Isothermal differential spectra**

**A:** Normalized isothermal difference (initial unfolded state minus final, associated state) for

the TG<sub>3</sub>T oligonucleotide 5'OH (black circles) or 5'phosphate (red triangles). Experimental conditions : spectra of TG<sub>3</sub>T (100 μM) and PO<sub>4</sub>-TG<sub>3</sub>T (300 μM) in 10 mM lithium cacodylate (pH 7.2), KCl 110 mM buffer are recorded at 4°C immediately after heat denaturation (*unfolded* state) and after overnight kinetics at 4°C (*associated* state).

**B:** Normalized isothermal difference (initial unfolded state minus final, associated state) for the TG<sub>3</sub>T oligonucleotide alone (black circles) or in the presence of various concentrations of ligand (blue curves). Note the positive signal in the visible region, showing that the absorbance properties of the dyes are affected when bound to the quadruplex. Contribution of ligand binding in the UV region modifies the amplitude of the main peaks without changing their characteristic wavelengths. The overall architecture is likely to be a G-quadruplex as also suggested by circular dichroism spectra. Experimental conditions: spectra of TG<sub>3</sub>T at 100 μM when alone, or at 10 μM in presence of 360A at 2.5, 5 and 10 μM are recorded at 4°C, in 10 mM lithium cacodylate (pH 7.2), KCl 110 mM buffer, immediately after heat denaturation (*unfolded* state) and after overnight kinetics at 4°C (*associated* state).

### **Supplementary Figure S4: Comparison of [TG<sub>3</sub>T]<sub>4</sub> and [PO<sub>4</sub>-TG<sub>3</sub>T]<sub>4</sub> association and dissociation**

**A:** Gel quantification of the single-stranded fraction using UV-shadow (red triangles: TG<sub>3</sub>T (**Fig. 3E** and **Fig. 2**) ; grey squares: PO<sub>4</sub>-TG<sub>3</sub>T) or radioactive detection (black diamonds: PO<sub>4</sub>-TG<sub>3</sub>T) ;  $k_{on}$  values are calculated using a fourth order model (21).

**B:** Effect of KCl concentration on association rate of 5'-OH (red circle) and 5' phosphate (black diamonds) oligonucleotides.

**C:** Effect of KCl concentration on thermal stability ( $T_{1/2}$  value) of 5'-OH (red circle) and 5' phosphate (black diamonds) G-quadruplexes. G-quadruplexes were performed at high

concentration (800 $\mu$ M) over night in Lithium cacodylate 10 mM pH 7.2 and 110 mM (for 30 mM, 50 mM and 110 mM experiments), 300 mM or 500 mM KCl. The corresponding buffer was then added to reach the convenient KCl final concentration and about 20 $\mu$ M in DNA (strand concentration).

### **Supplementary Figure S5: Interaction of 360A with [PO<sub>4</sub>-TG<sub>3</sub>T]<sub>4</sub>: fluorescence quenching.**

Fluorescence titration of 360A by [PO<sub>4</sub>-TG<sub>3</sub>T]<sub>4</sub> or PO<sub>4</sub>-TG<sub>3</sub>T at 4°C in Lithium Cacodylate pH 7.2, KCl 110mM. Left panel: 360A (0.6 $\mu$ M) fluorescence spectra for excitation at 320nm in presence of increasing amounts of [PO<sub>4</sub>-TG<sub>3</sub>T]<sub>4</sub> (G-quadruplex preformed at high concentration in the same buffer); central panel: 360A (0.5 $\mu$ M) fluorescence spectra for excitation at 320nm in presence of increasing amounts of single stranded PO<sub>4</sub>-TG<sub>3</sub>T; right panel: integrated fluorescence normalized to the fluorescence of 360A alone as a function of PO<sub>4</sub>-TG<sub>3</sub>T molar equivalent (lower X-axis ; blue circles) or [PO<sub>4</sub>-TG<sub>3</sub>T]<sub>4</sub> molar equivalent (upper X-axis ; black triangles).

### **Supplementary Figure S6: Effect of 360A on other sequences.**

**A:** Association kinetics of [T<sub>2</sub>AG<sub>3</sub>]<sub>4</sub> incubated at 4°C at a strand concentration of 200 $\mu$ M or 100  $\mu$ M in absence or presence of 360A at 10 and 25  $\mu$ M.

**B:** Association kinetics of [T<sub>2</sub>AG<sub>3</sub>T]<sub>4</sub> incubated at 4°C at a strand concentration of 100  $\mu$ M in absence or presence of 360A at 10, 25 and 50  $\mu$ M.

Both kinetics are performed in 10 mM Lithium Cacodylate pH 7.2, 110 mM KCl buffer. Products are resolved by a 20% native acrylamide gel electrophoresis performed at 4°C

containing 1X TBE and 20 mM KCl, and detected by UV shadow at 254 nm.

**C:** lane 1-5: Association of  $[T_2G_5T_2]_4$  at 100  $\mu$ M strand concentration in 10mM Lithium cacodylate pH 7.2, 110 mM NaCl buffer after 1hour of incubation at 4°C in presence of various concentration of 360A. Lane 6-10: preformed G-quadruplex  $[T_2G_5T_2]_4$  in absence or presence of various concentrations of 360A. The gel-shift of the G-quadruplex induced by the ligand 360A (lanes 2-5) is nearly identical to the one of the preformed G-quadruplex bound to 360A (lane 7-10).

## References:

1. Lemarteleur, T., Gomez, D., Paterski, R., Mandine, E., Mailliet, P. and Riou, J.-F. (2004) Stabilization of the c-myc gene promoter quadruplex by specific ligands inhibitors of telomerase. *Biochem. Biophys. Res. Com.*, **323**, 802-808.
2. Pennarun, G., Granotier, C., Gauthier, L.R., Gomez, D., Hoffschir, F., Mandine, E., Riou, J.F., Mergny, J.L., Mailliet, P. and Boussin, F.D. (2005) Apoptosis related to telomere instability and cell cycle alterations in human glioma cells treated by new highly selective G-quadruplex ligands. *Oncogene*, **24**, 2917-2928.
3. Granotier, C., Pennarun, G., Riou, L., Hoffschir, F., Gauthier, L.R., DeCian, A., Gomez, D., Mandine, E., Riou, J.F., Mergny, J.L. *et al.* (2005) Preferential binding of a G-quadruplex ligand to human chromosome ends. *Nucl Acid Res*, **33**, 4182-4190.
4. Shin-ya, K., Wierzba, K., Matsuo, K., Ohtani, T., Yamada, Y., Furihata, K., Hayakawa, Y. and Seto, H. (2001) Telomestatin, a novel telomerase inhibitor from *Streptomyces anulatus*. *J. Am. Chem. Soc.*, **123**, 1262-1263.
5. Kim, M.Y., Vankayalapati, H., Shin-ya, K., Wierzba, K. and Hurley, L.H. (2002) Telomestatin, a potent telomerase inhibitor that interacts quite specifically with the human telomeric intramolecular G-quadruplex. *J. Am. Chem. Soc.*, **124**, 2098-2099.
6. Kim, M.Y., Gleason Guzman, M., Izbicka, E., Nishioka, D. and Hurley, L.H. (2003) The different biological effects of telomestatin and TMPyP4 can be attributed to their selectivity for interaction with intramolecular or intermolecular G-quadruplex structures. *Cancer Res.*, **63**, 3247-3256.
7. Izbicka, E., Wheelhouse, R.T., Raymond, E., Davidson, K.K., Lawrence, R.A., Sun, D.Y., Windle, B.E., Hurley, L.H. and VonHoff, D.D. (1999) Effects of cationic porphyrins as G-quadruplex interactive agents in human tumor cells. *Cancer Res.*, **59**, 639-644.
8. Han, F.X.G., Wheelhouse, R.T. and Hurley, L.H. (1999) Interactions of TMPyP4 and TMPyP2 with quadruplex DNA. Structural basis for the differential effects on telomerase inhibition. *J. Am. Chem. Soc.*, **121**, 3561-3570.
9. Han, H., Langley, D.R., Rangan, A. and Hurley, L.H. (2001) Selective Interactions of Cationic Porphyrins with G-Quadruplex Structures. *J. Am. Chem. Soc.*, **123**, 8902-8913.

10. Wei, C., Jia, G., Yuan, J., Feng, Z. and Li, C. (2006) A spectroscopic study on the interactions of porphyrin with G-quadruplex DNAs. *Biochemistry*, **45**, 6681-6691.
11. Guo, Q., Lu, M., Marky, L.A. and Kallenbach, N.R. (1992) Interaction of the dye ethidium bromide with DNA containing guanine repeats. *Biochemistry*, **31**, 2451-2455.
12. Koeppel, F., Riou, J.F., Laoui, A., Mailliet, P., Arimondo, P.B., Labit, D., Petigenet, O., Hélène, C. and Mergny, J.L. (2001) Ethidium derivatives bind to G-quartets, inhibit telomerase and act as fluorescent probes for quadruplexes. *Nucleic Acids Res.*, **29**, 1087-1096.
13. Rosu, F., Pauw, E.D., Guittat, L., Alberti, P., Lacroix, L., Mailliet, P., Riou, J.-F. and Mergny, J.-L. (2003) Selective interaction of ethidium derivatives with quadruplexes. *Biochemistry*, **42**, 10361-10371.
14. Riou, J.F., Guittat, L., Mailliet, P., Laoui, A., Petigenet, O., Megnin-Chanet, F., Hélène, C. and Mergny, J.L. (2002) Cell senescence and telomere shortening induced by a new series of specific G-quadruplex DNA ligands. *Proc. Natl. Acad. Sci. USA*, **99**, 2672-2677.
15. Read, M., Harrison, R.J., Romagnoli, B., Tanious, F.A., Gowan, S.H., Reszka, A.P., Wilson, W.D., Kelland, L.R. and Neidle, S. (2001) Structure-based design of selective and potent G quadruplex-mediated telomerase inhibitors. *Proc. Natl. Acad. Sci. USA*, **98**, 4844-4849.
16. Sun, D., Thompson, B., Cathers, B.E., Salazar, M., Kerwin, S.M., Trent, J.O., Jenkins, T.C., Neidle, S. and Hurley, L.H. (1997) Inhibition of human telomerase by a G-quadruplex-interactive compound. *J. Med. Chem.*, **40**, 2113-2116.
17. Han, H.Y., Cliff, C.L. and Hurley, L.H. (1999) Accelerated assembly of G-quadruplex structures by a small molecule. *Biochemistry*, **38**, 6981-6986.
18. Kern, J.T., Thomas, P.W. and Kerwin, S.M. (2002) The relationship between ligand aggregation and G-quadruplex DNA selectivity in a series of 3,4,9,10-perylenetetracarboxylic acid diimides. *Biochemistry*, **41**, 11379-11389.
19. Kerwin, S.M., Chen, G., Kern, J.T. and Thomas, P.W. (2002) Perylene diimide G-quadruplex DNA binding selectivity is mediated by ligand aggregation. *Bioorg Medicinal Chem Letter*, **12**, 447-450.
20. De Cian, A., Guittat, L., Kaiser, M., Saccà, B., Amrane, S., Bourdoncle, A., Alberti, P., Teulade-Fichou, M.P., Lacroix, L. and Mergny, J.L. (2007) Fluorescence-based melting assays for studying quadruplex ligands. *Methods*, **in press**.
21. Mergny, J.L., De Cian, A., Ghelab, A., Saccà, B. and Lacroix, L. (2005) Kinetics of tetramolecular quadruplexes. *Nucleic Acids Res.*, **33**, 81-94.



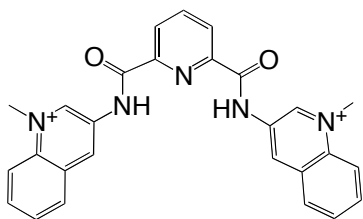

**360A**

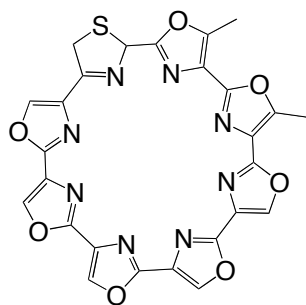

**Telomestatin**

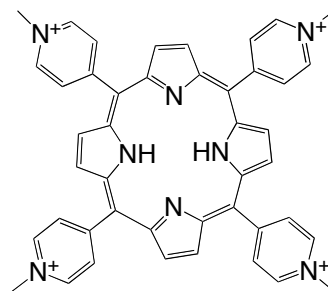

**TMPyP4**

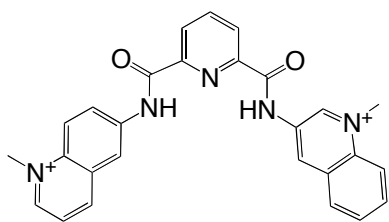

**307A**

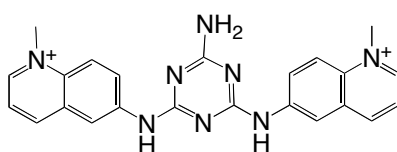

**12459**

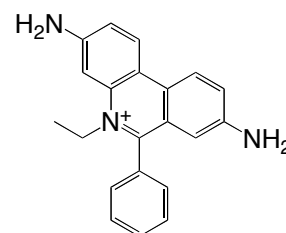

**EtBr**

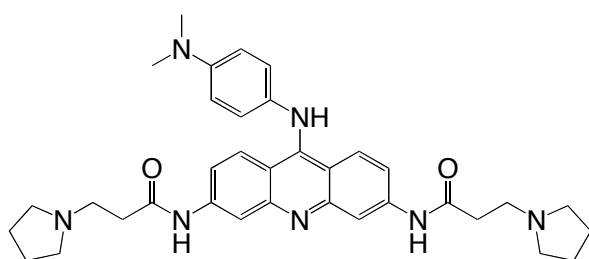

**BRACO19**

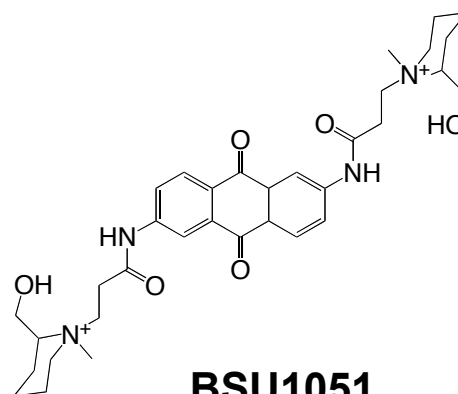

**BSU1051**

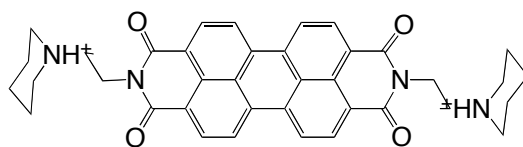

**PIPER**

Supplementary Figure S1

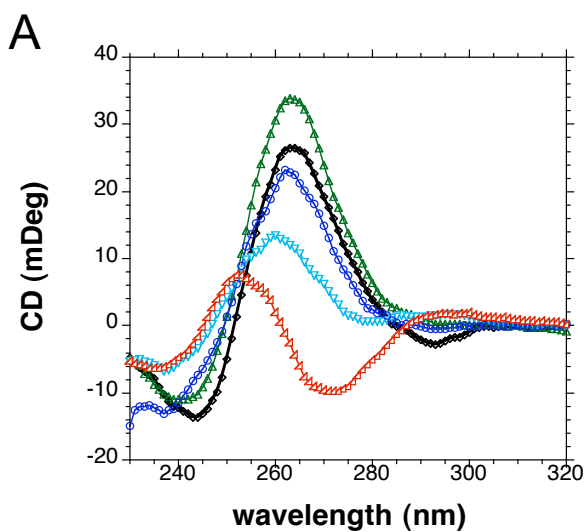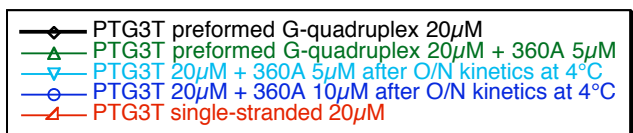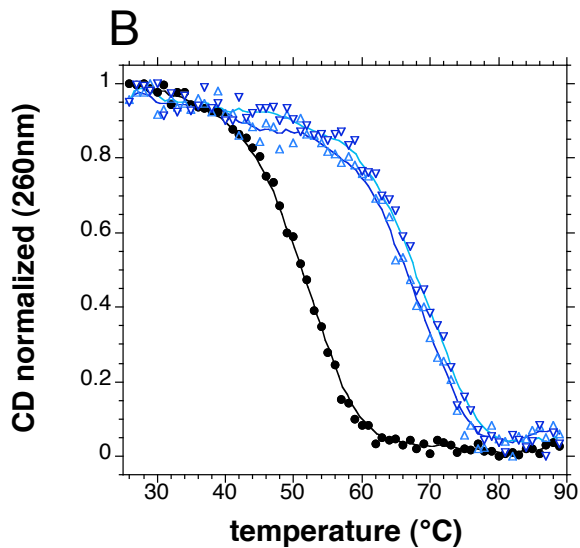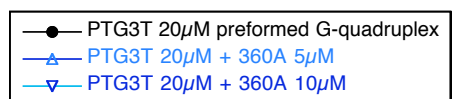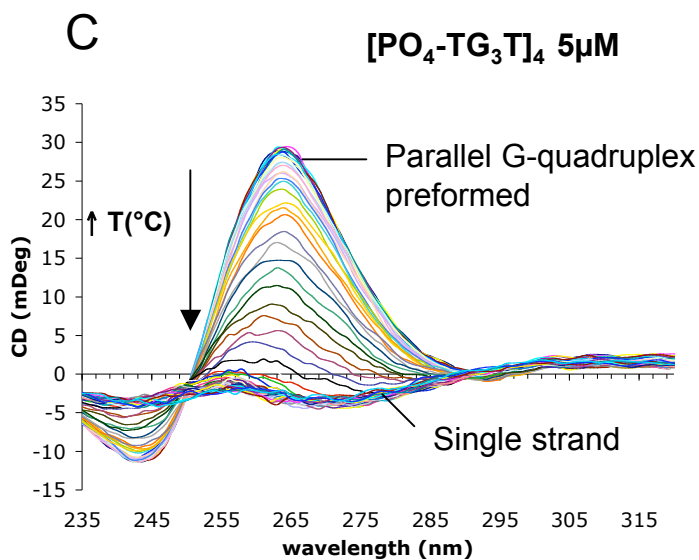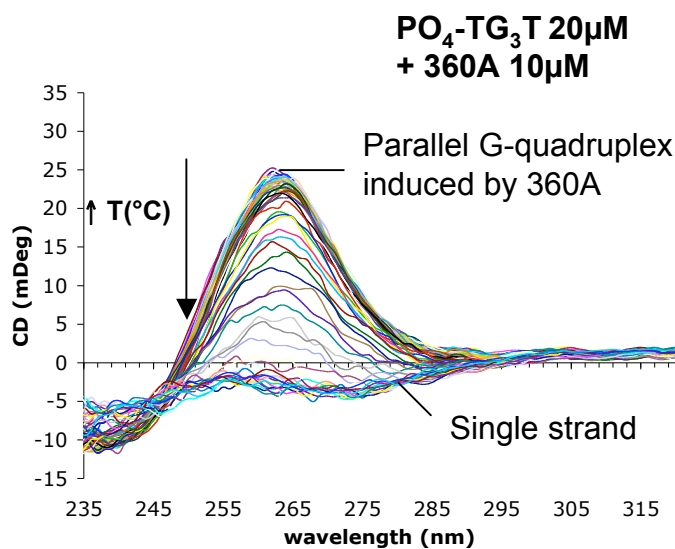

Supplementary Figure S2

A

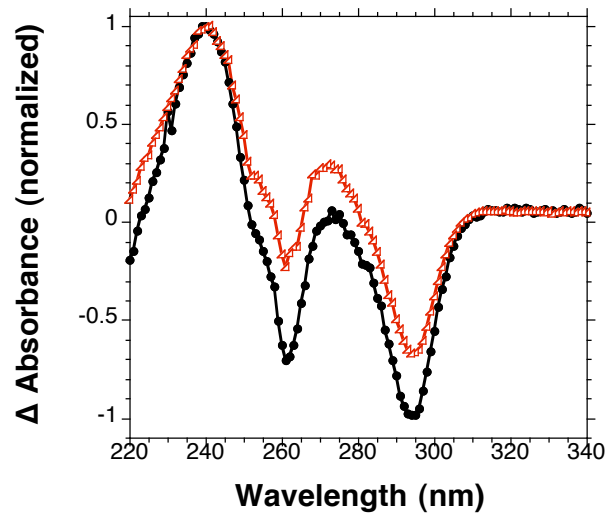

B

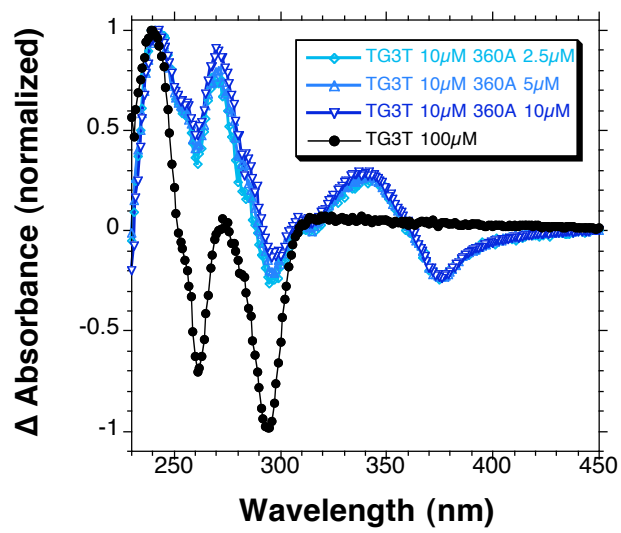

Supplementary Figure S3

A

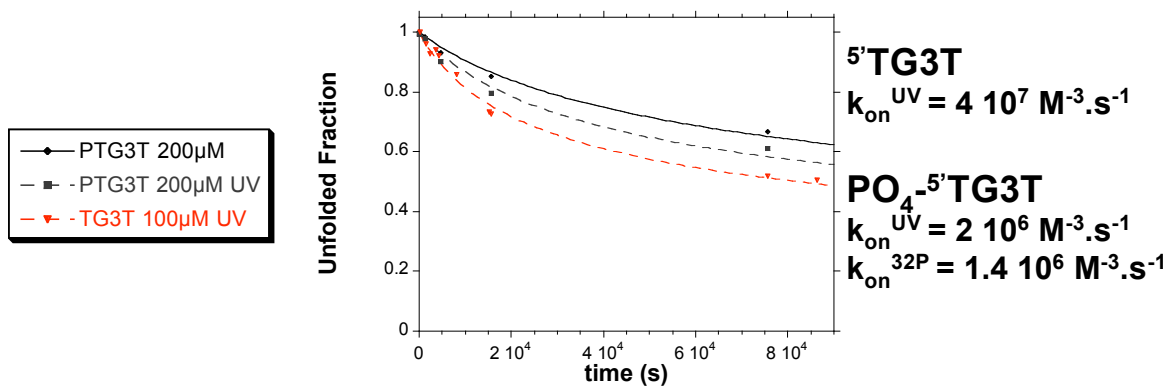

B

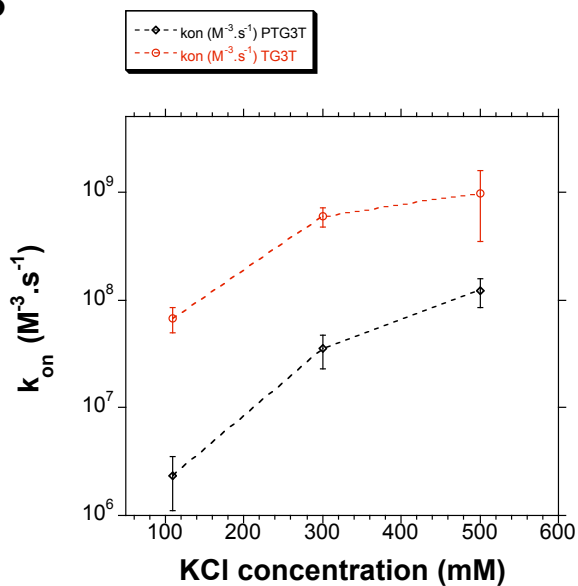

C

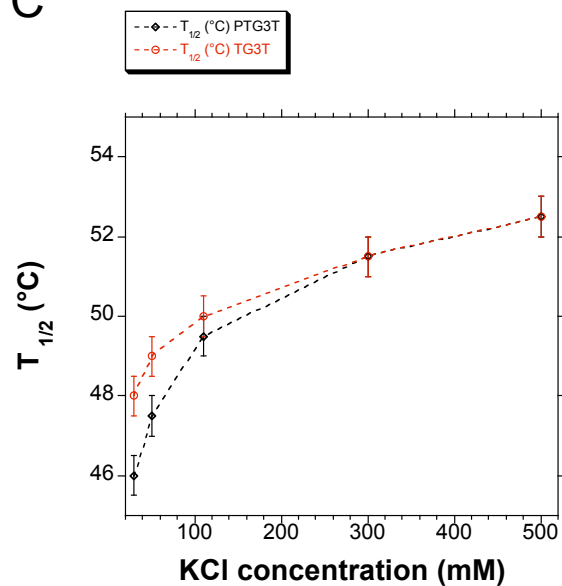

Supplementary Figure S4

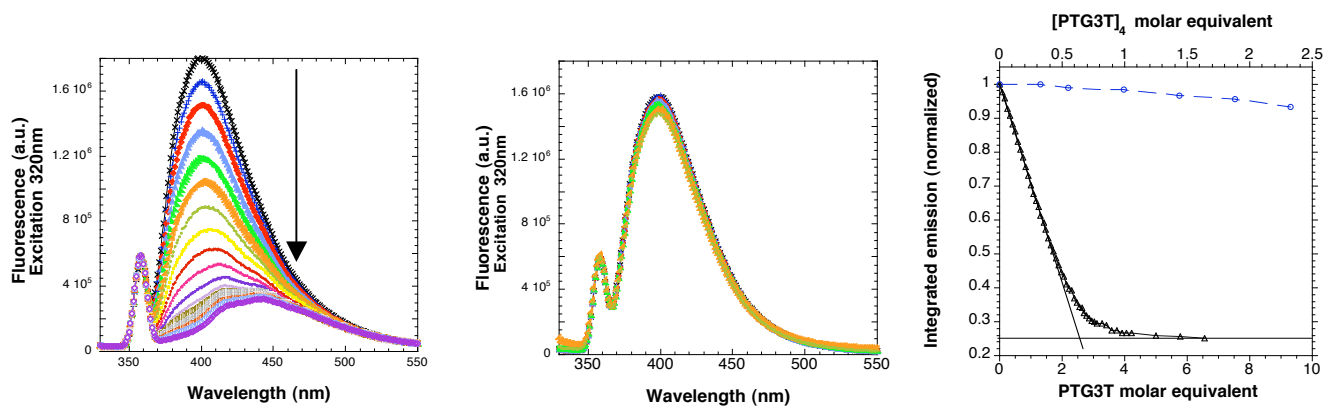

Supplementary Figure S5

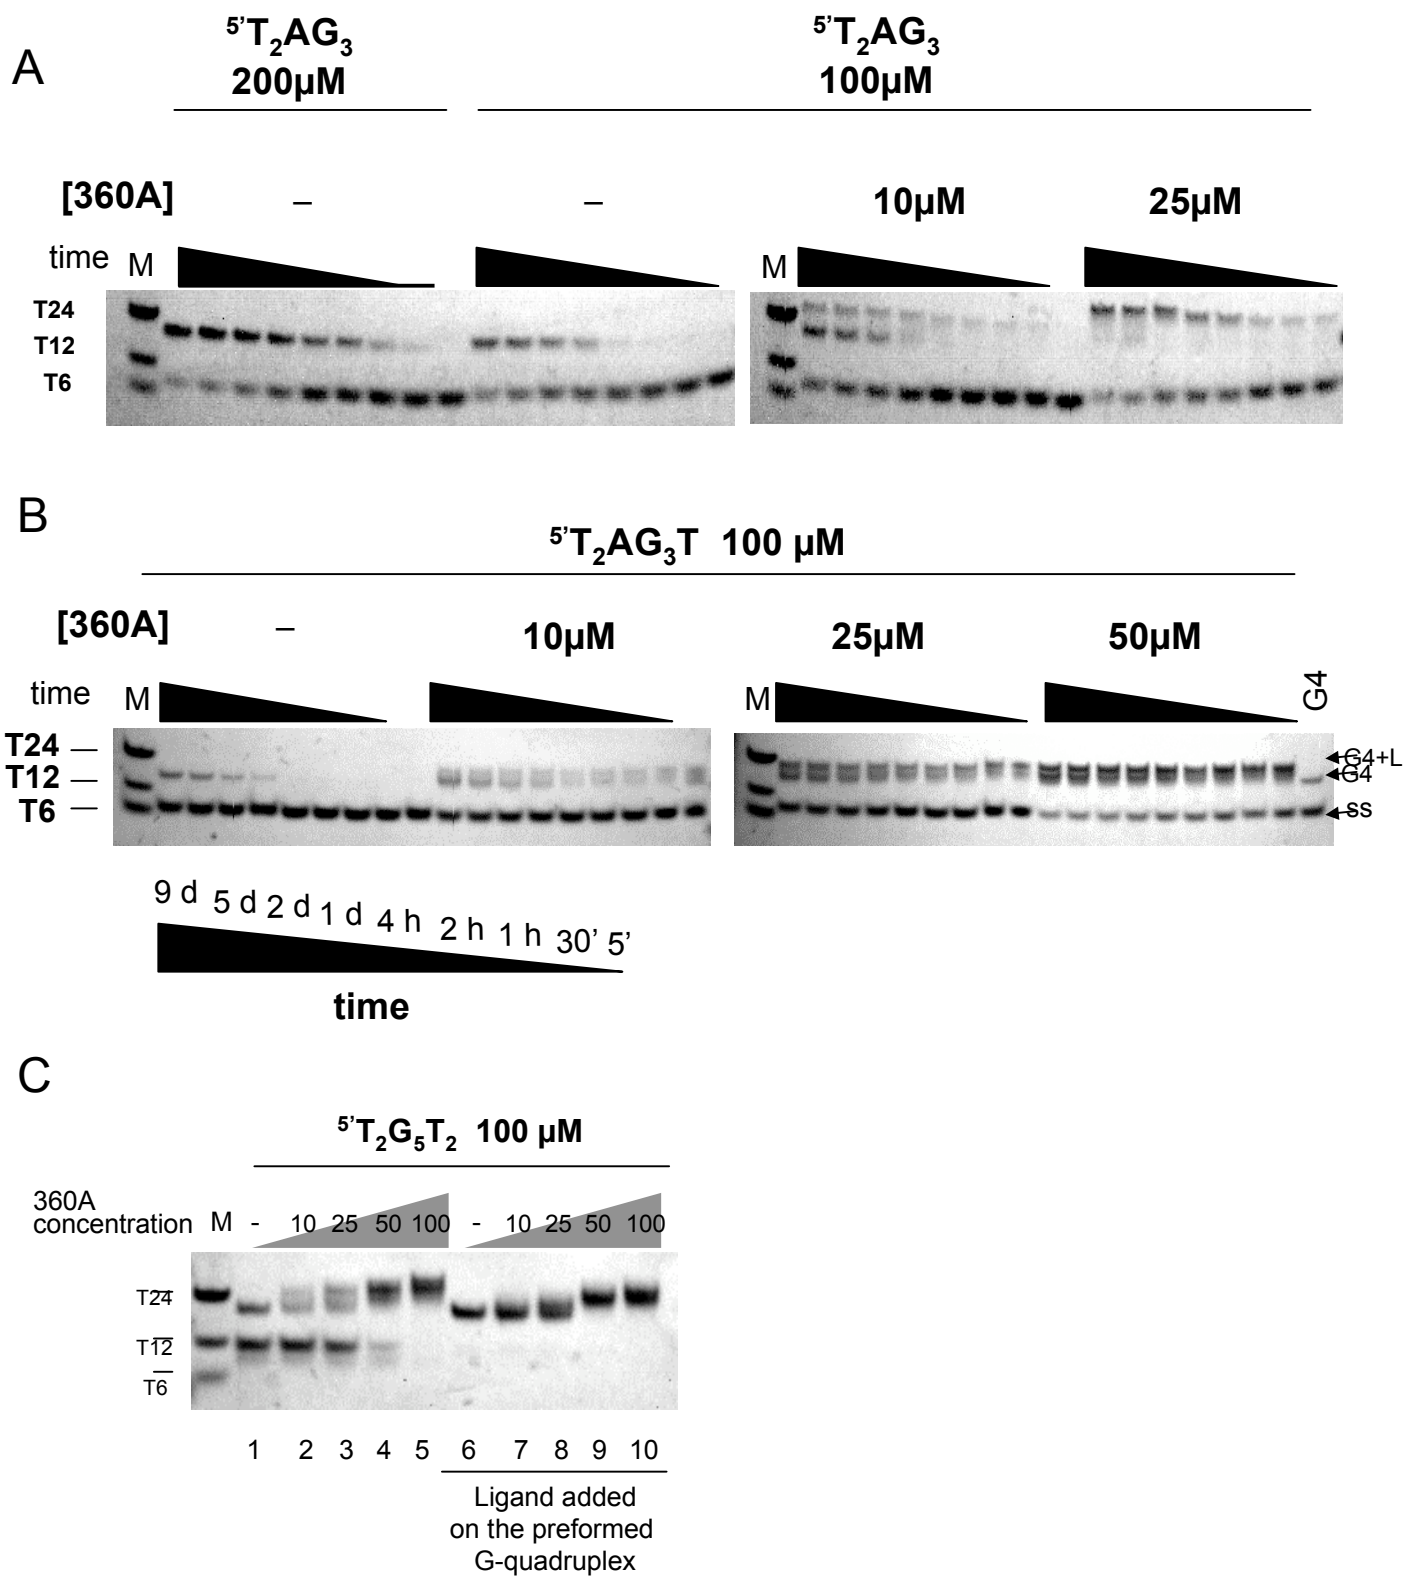

Supplementary Figure S6
